# Supplementary material for: Ginsenoside Rh1 Inhibits Angiotensin II-Induced Vascular Smooth Muscle Cell Migration and Proliferation through Suppression of the ROS-Mediated ERK1/2/p90RSK/KLF4 Signaling Pathway
Source: MDPI journal article supplement (doi:10.3390/antiox11040643), 2022-03-27

Whole blot supplementary materials

Figure 1C

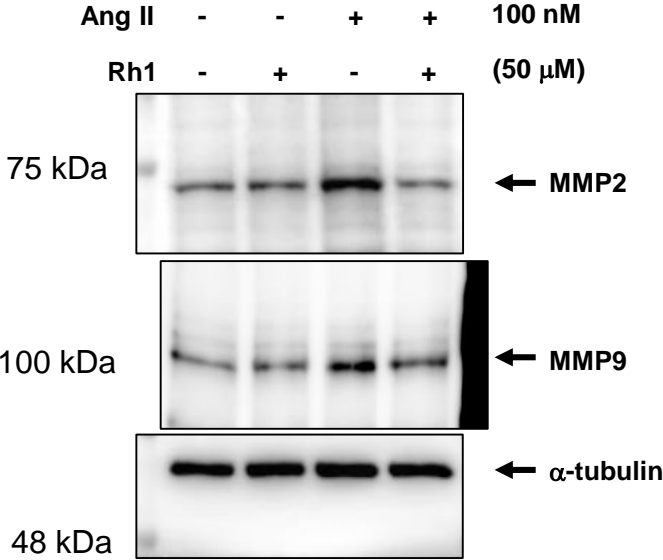

Figure 2B

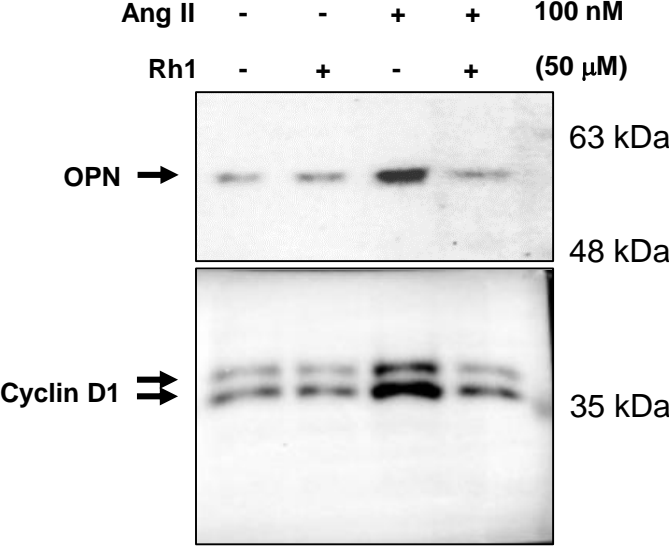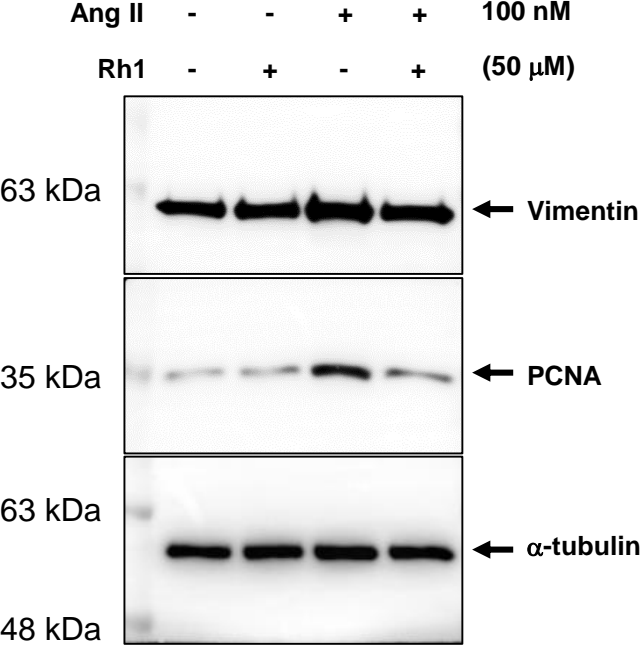

**Figure 3A**

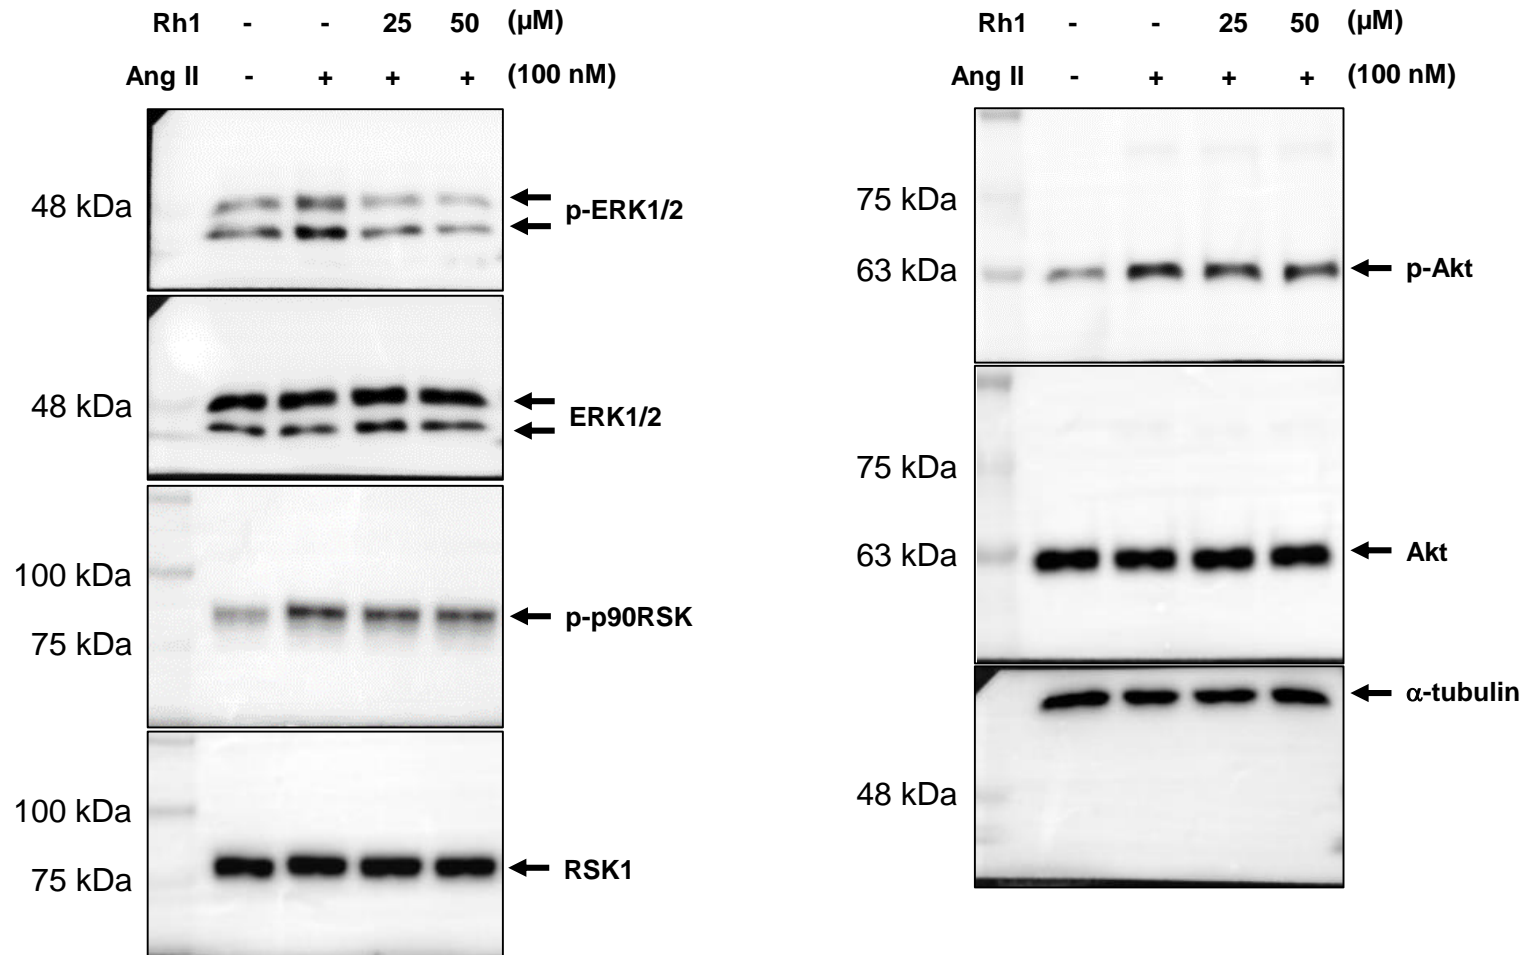

Figure 3C

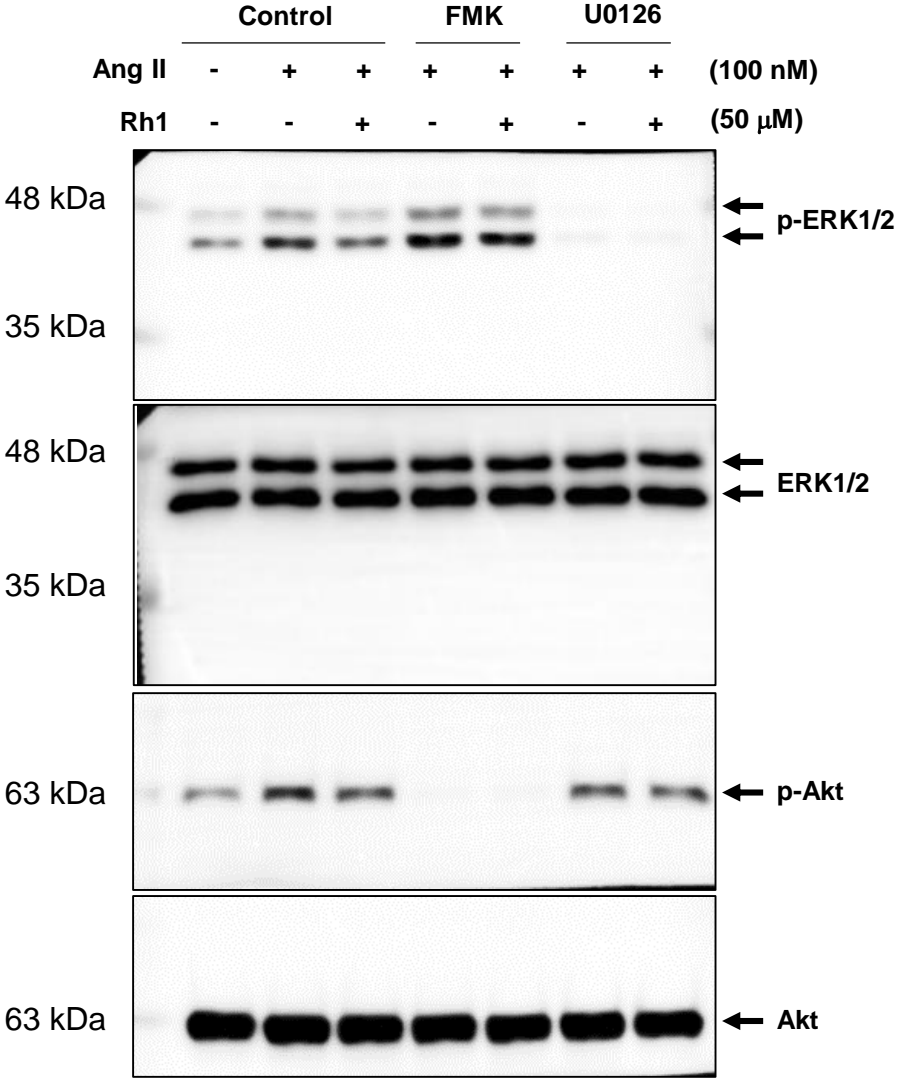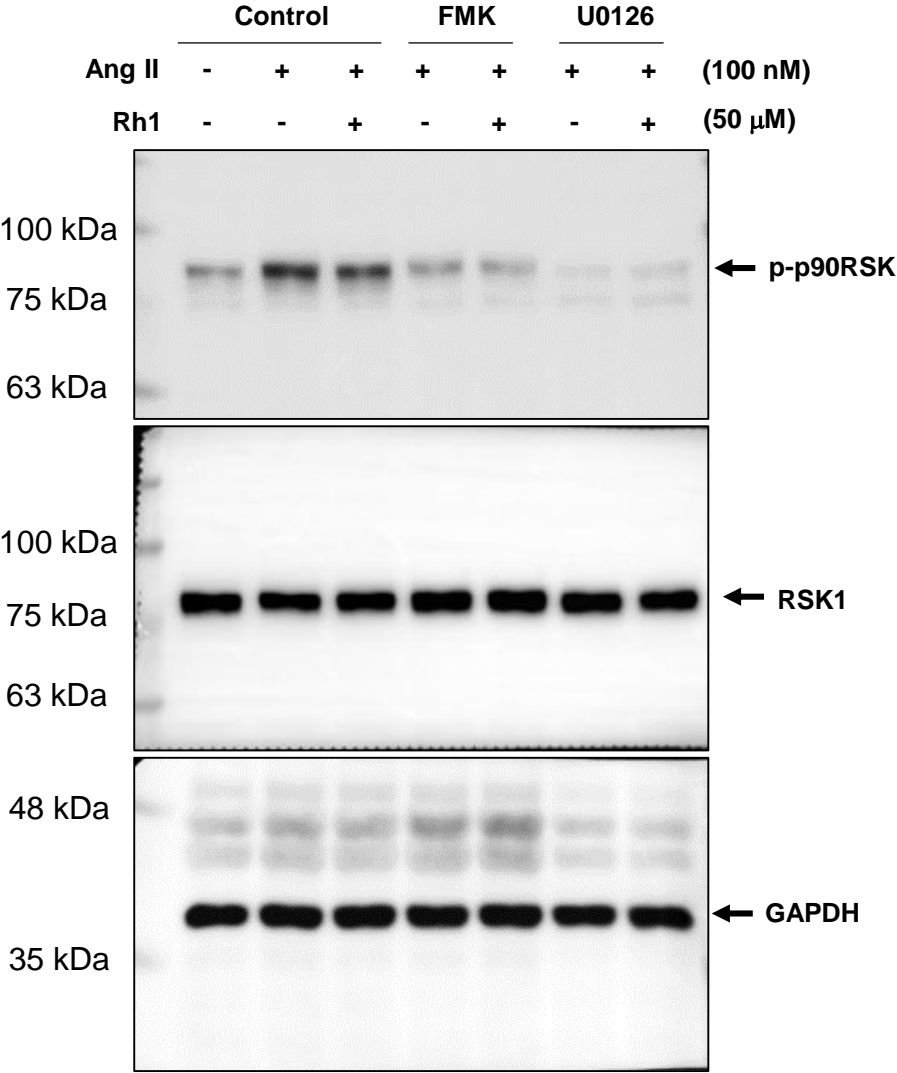

**Figure 4A**

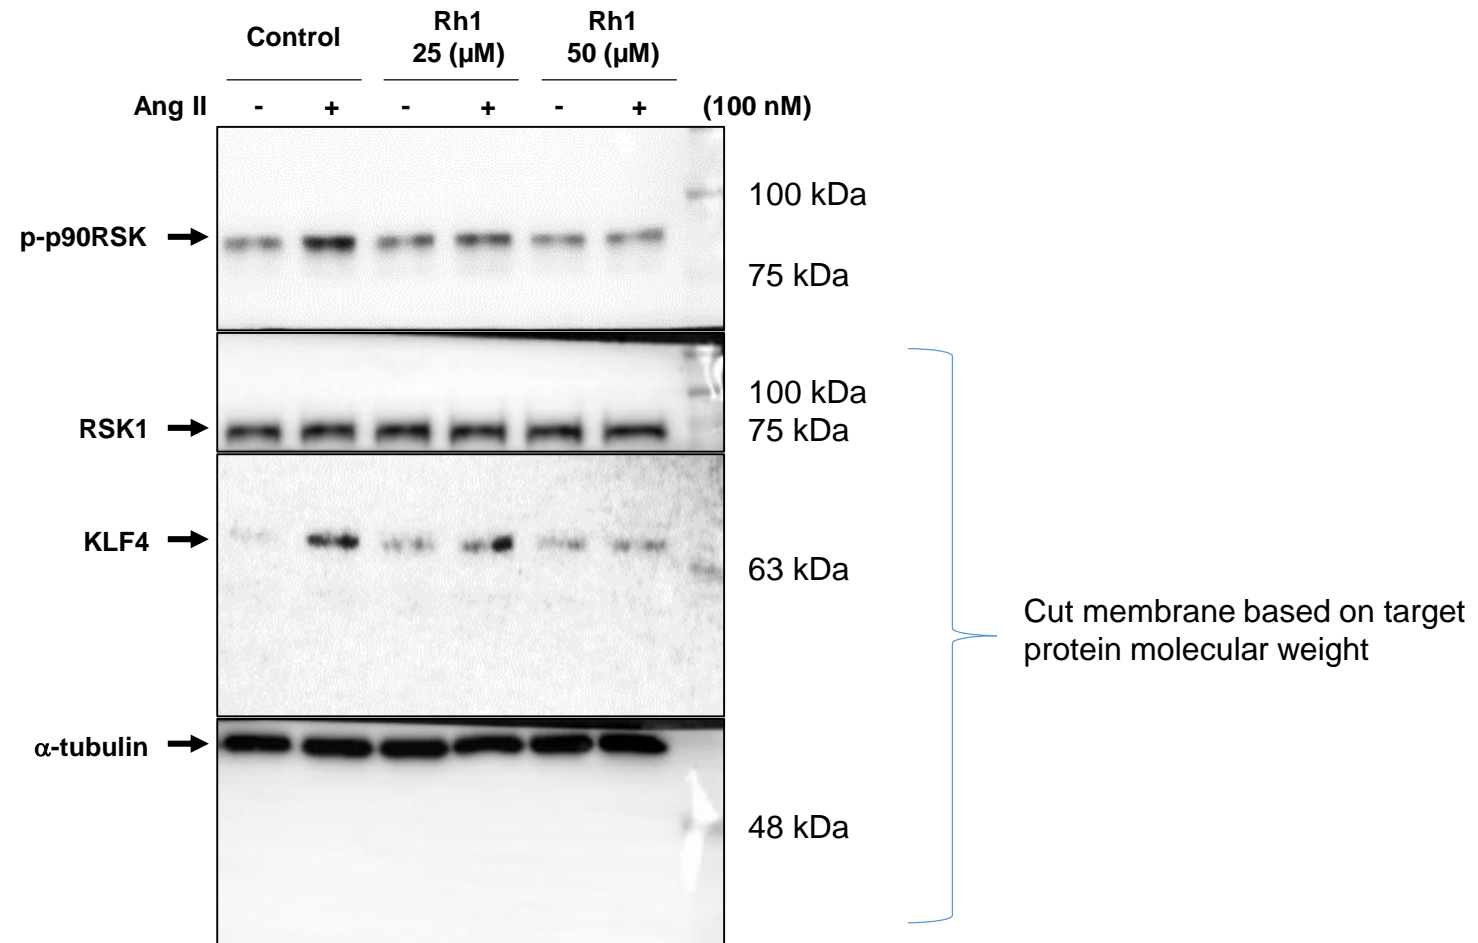

# Figure 5C

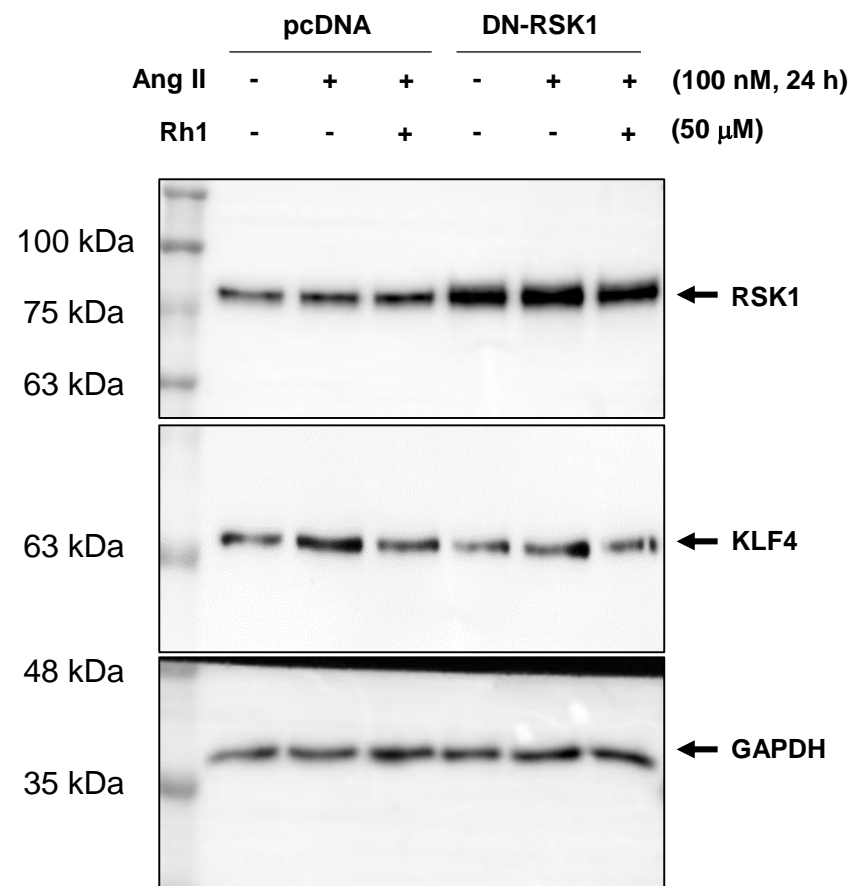

# Figure 5D

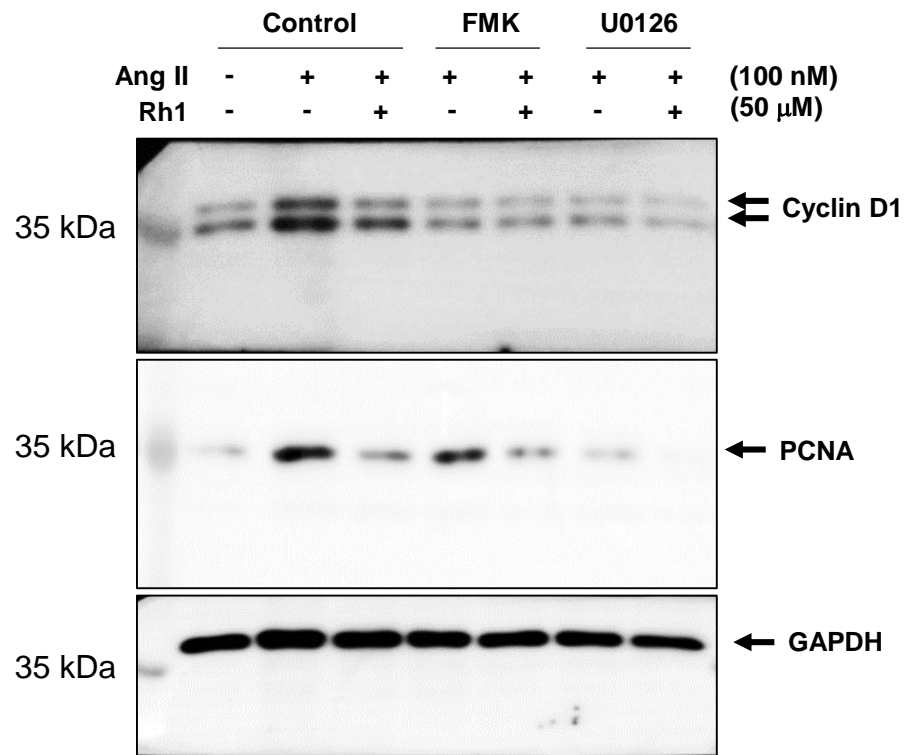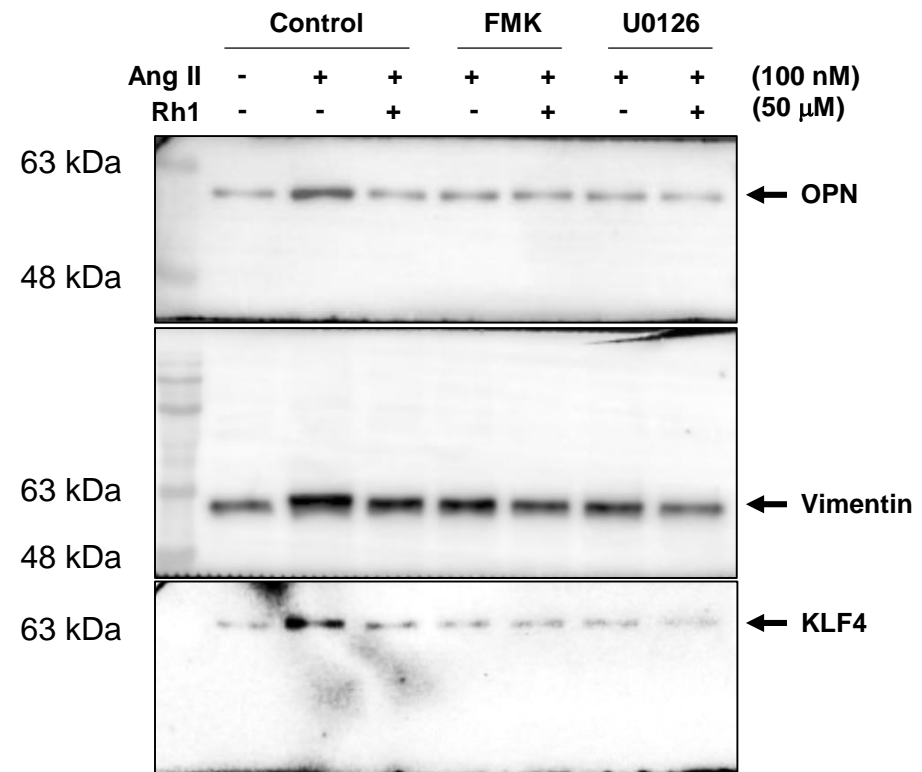

Figure 5E

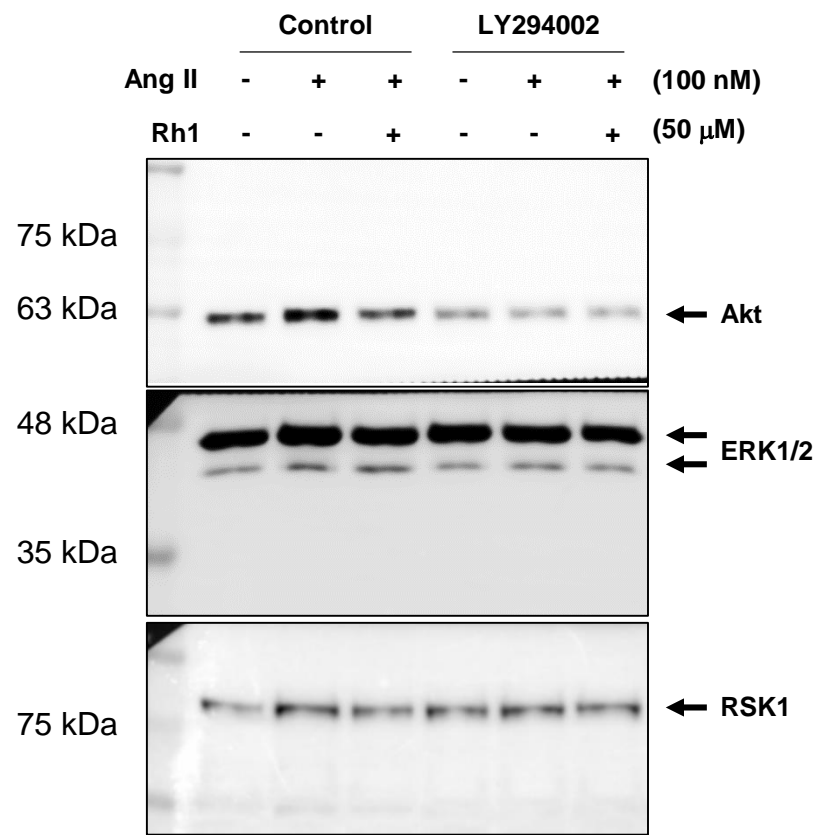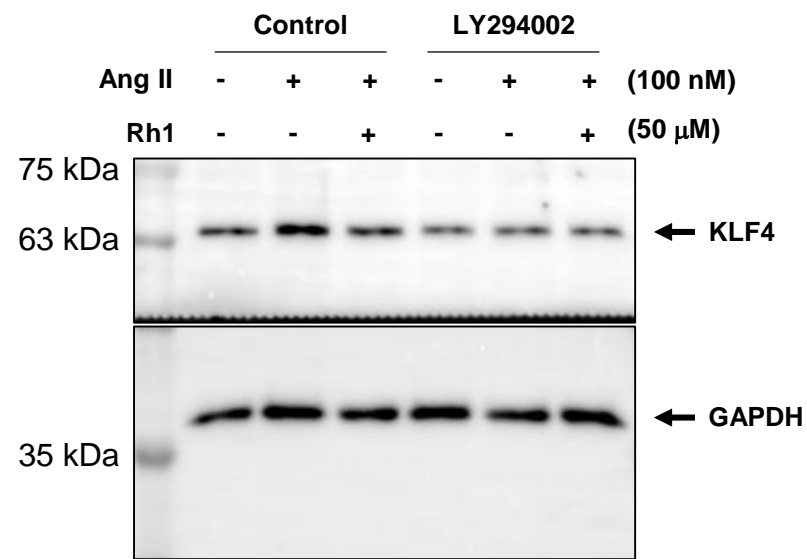



**Figure 6C**

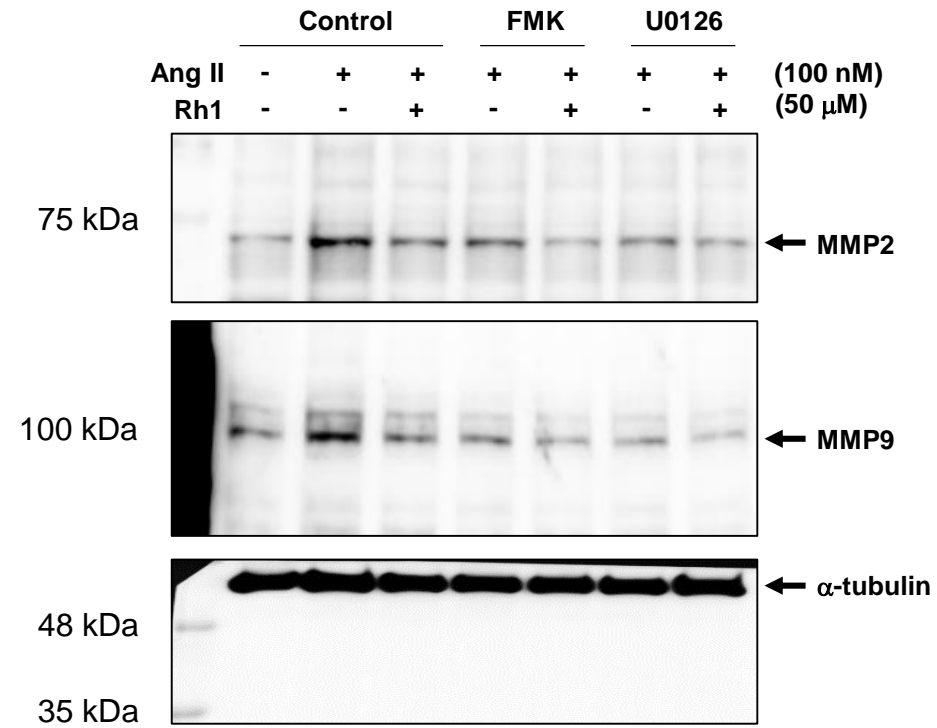

Figure 7C

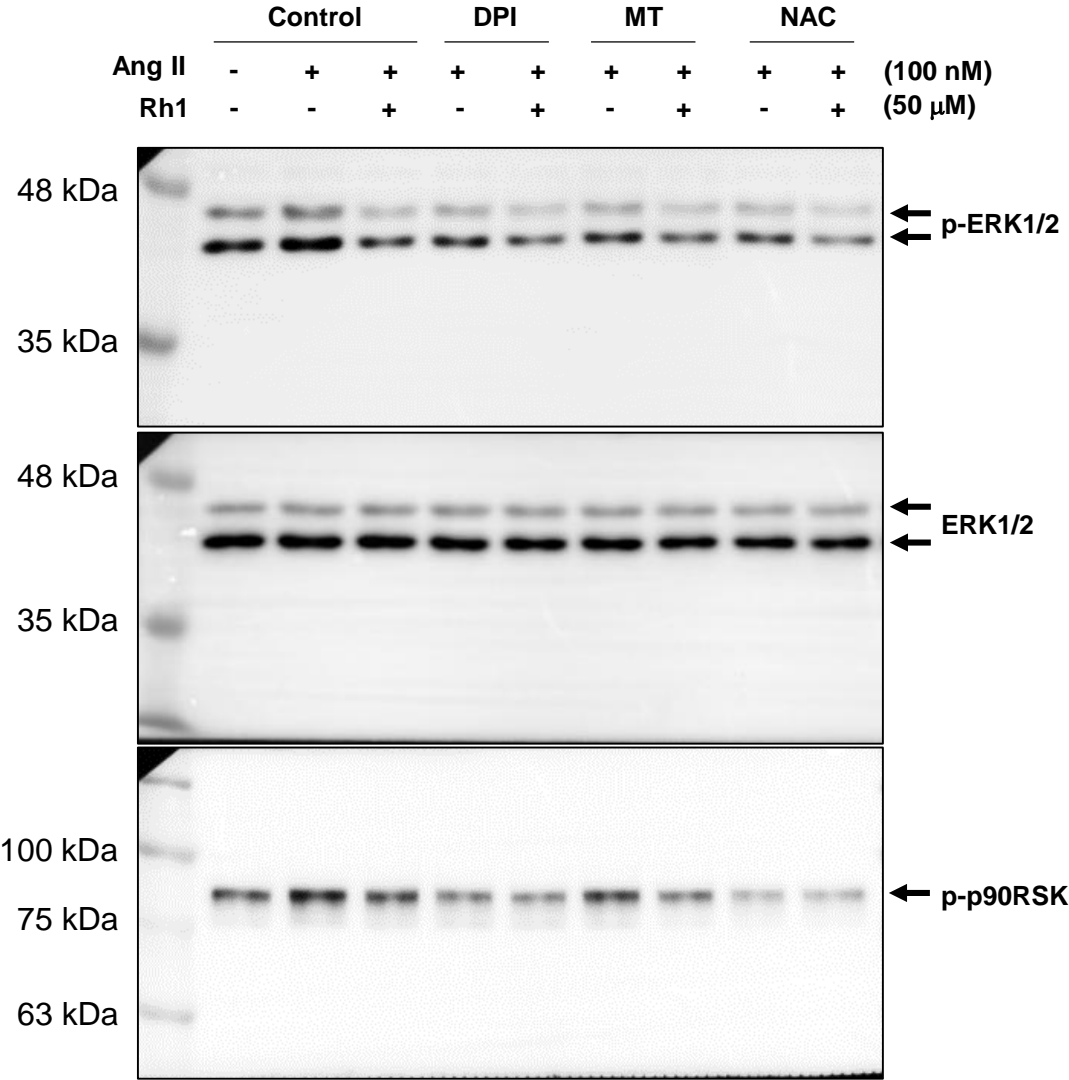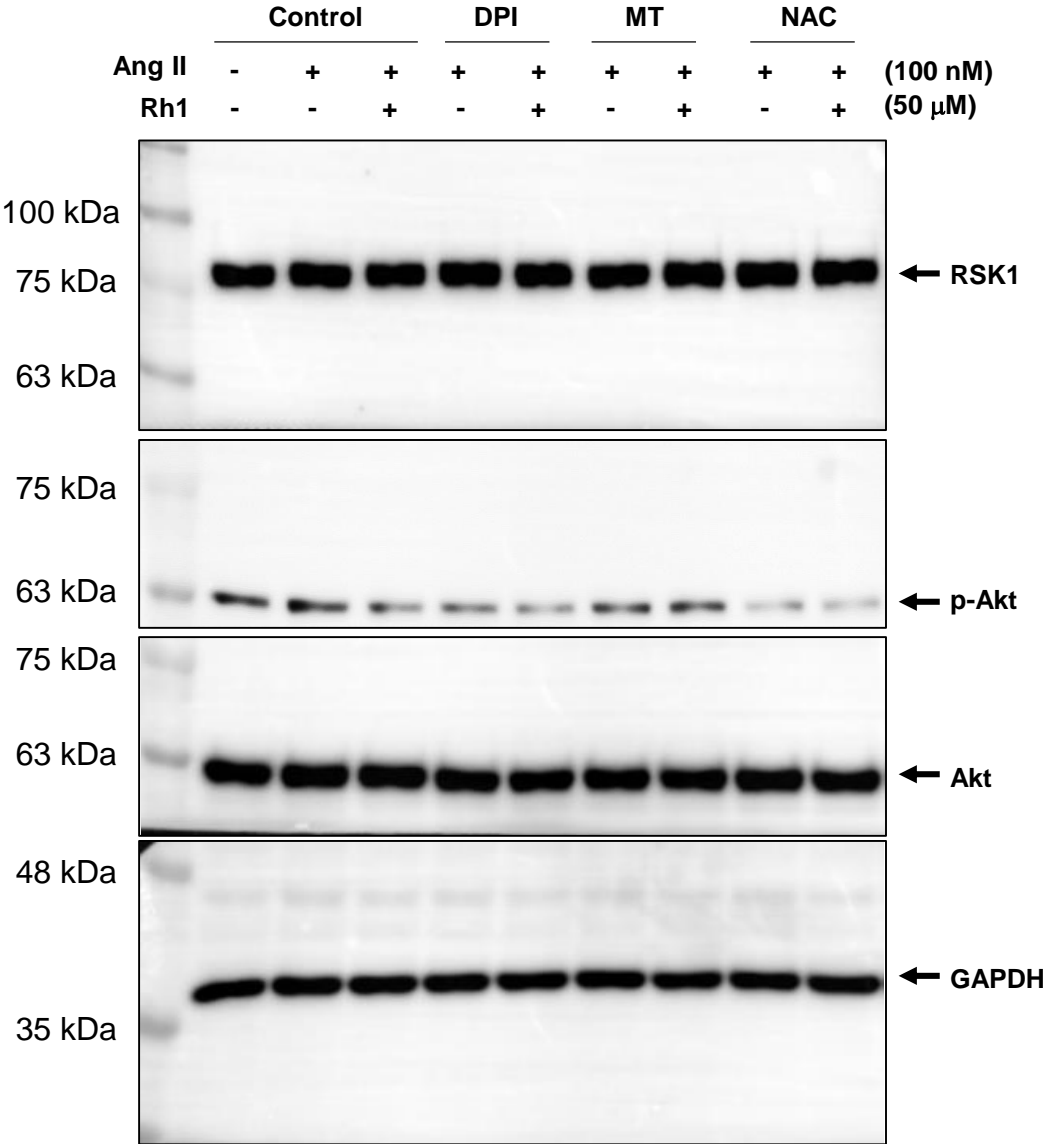

Figure 8E

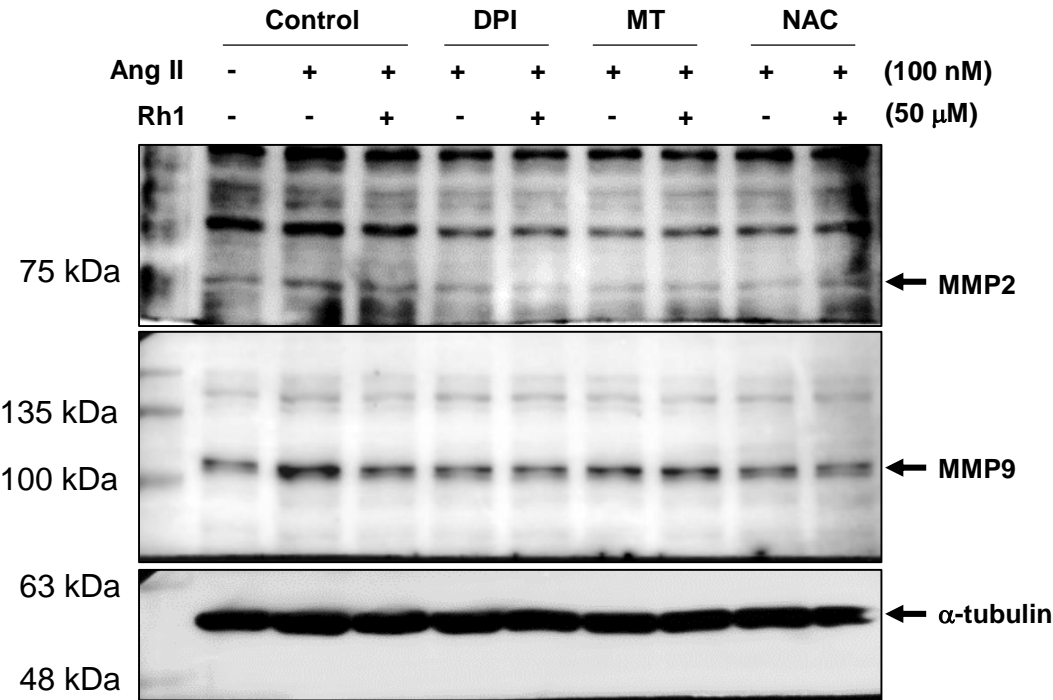

Figure 9A

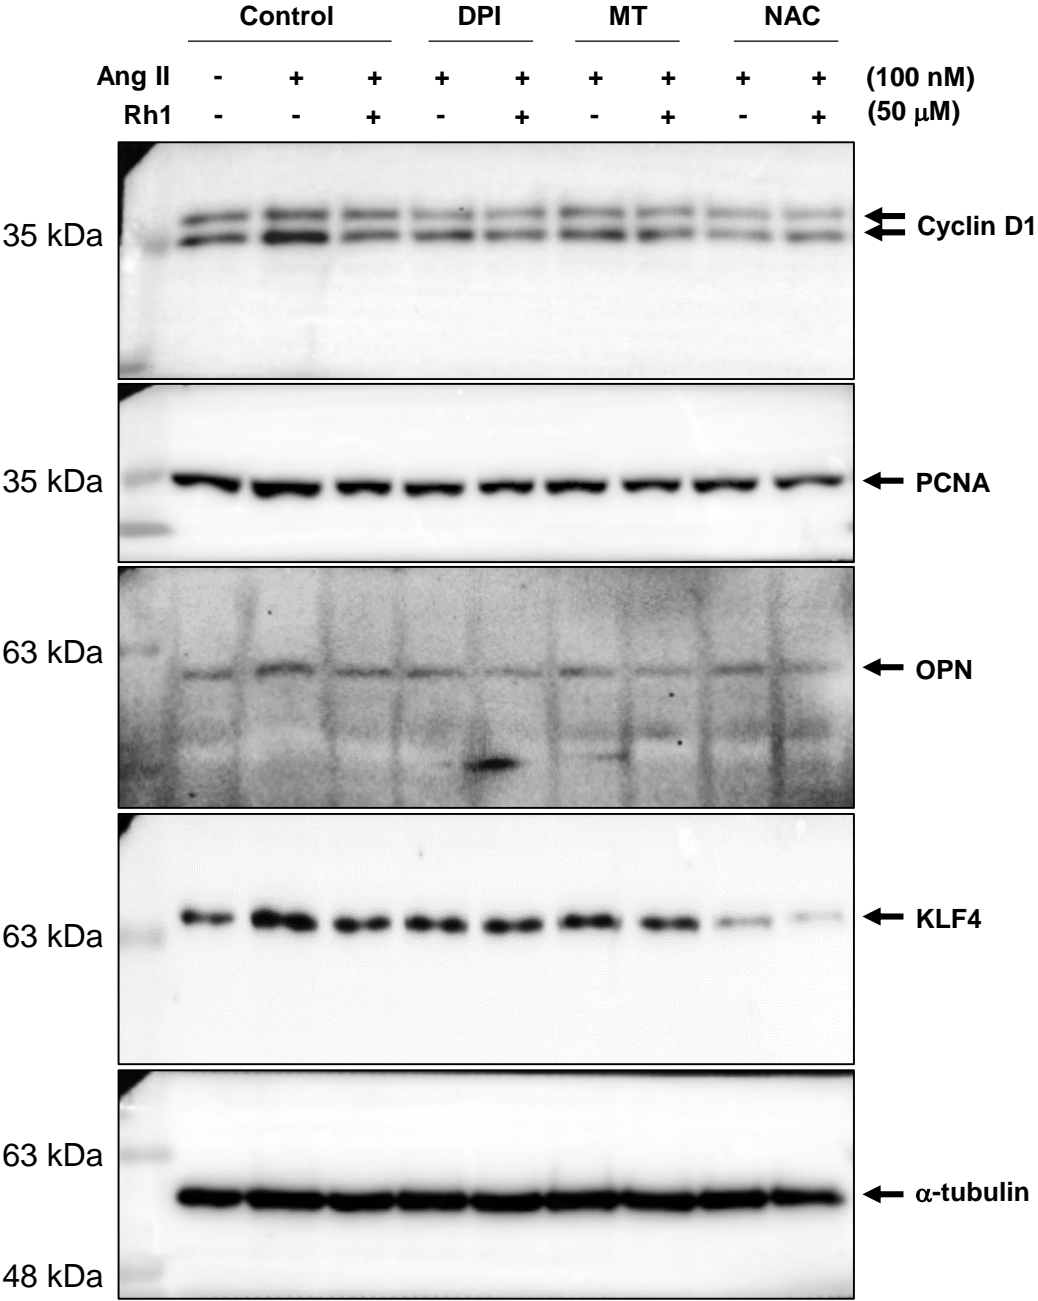

Figure 9F

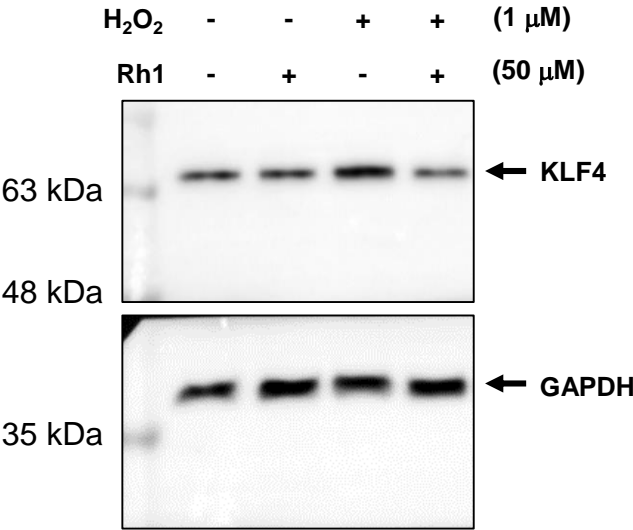

Supplement: s1 [file s1]
