# Supplementary material for: Ginsenoside Rh1 Inhibits Angiotensin II-Induced Vascular Smooth Muscle Cell Migration and Proliferation through Suppression of the ROS-Mediated ERK1/2/p90RSK/KLF4 Signaling Pathway
Source: MDPI journal article supplement (doi:10.3390/antiox11040643), 2022-03-27
Supplement: s1 [file s1]

## Supplementary figures

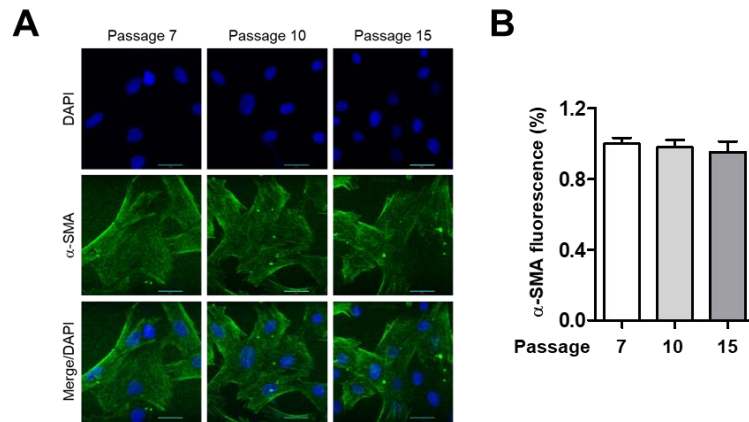

**Figure S1.**  $\alpha$ -smooth muscle actin ( $\alpha$ -SMA) expression in rat aortic smooth muscle cells at different passages (7, 10, and 15). The immunofluorescence analysis was performed after immunostaining with  $\alpha$ -SMA antibody. DAPI was co-stained for indicating the nucleus. Representative photographs are shown at  $\times 200$  magnification (scale bar:  $30\ \mu\text{m}$ ) (A). The relative fluorescent intensity of  $\alpha$ -SMA was quantified by Image J software (B). Data are expressed as the mean  $\pm$  SEM ( $n = 3$ ).
